# Supplementary material for: Pulsed plasma deposition of zirconia thin films on UHMWPE: proof of concept of a novel approach for joint prosthetic implants
Source: Royal Society of Chemistry journal article supplement (doi:10.1039/c2tb00077f), 2012-10-25
Supplement: c2tb00077f.pdf [file c2tb00077f.pdf]

## SUPPORTING INFORMATIONS

### “Pulsed Plasma Deposition of zirconia thin films on UHMWPE: proof of concept of a novel approach for joint prosthetic implants”

M. Bianchi, A. Russo, N. Lopomo, M. Boi, M.C. Maltarello, S. Sprio, M. Baracchi and M. Marcacci.

Fig. S1

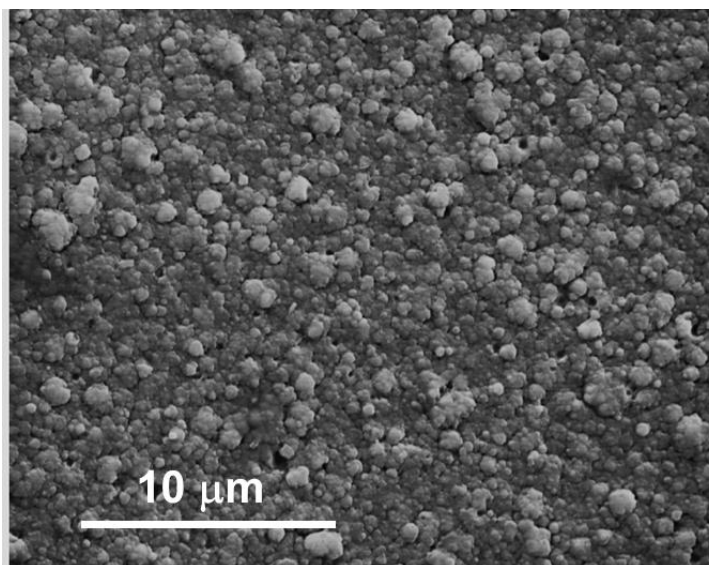

Low-magnification SEM image of the surface of a zirconia coated-UHMWPE by Pulsed Plasma Deposition..

Fig. S2

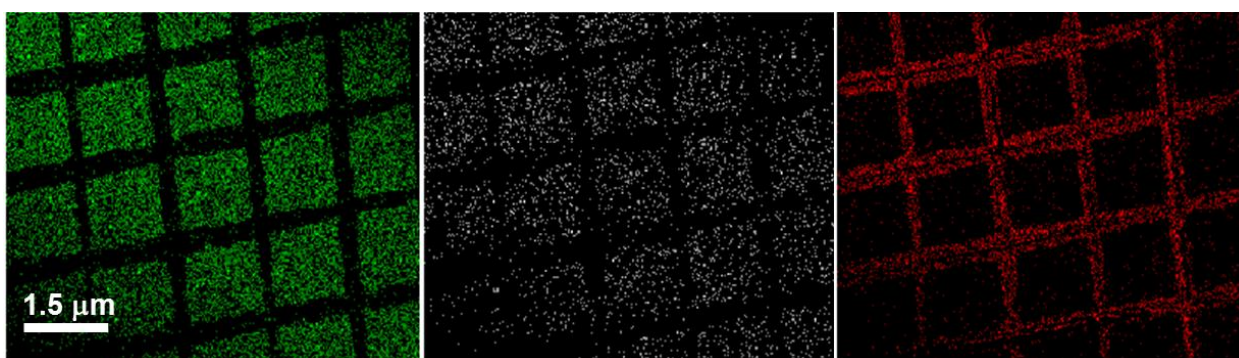

EDX-Elemental composition of the surface of the  $ZrO_2$ /UHMWPE sample after tape-test, Elemental distribution of: Zirconium (green), Oxygen (white), Carbon (red).

The operating conditions were:  $0^\circ$  tilt angle,  $35^\circ$  take-off angle, 20 kV acceleration potential, 25 mm working distance.

The EDX analysis well evidenced the areas still covered by the film after the tape test, as well as the areas where the UHMWPE has been exposed.
